# Supplementary material
Source: MDPI journal article supplement (https://www.mdpi.com/2073-4395/13/1/222)

**Table S1.** - Effect of N rate supply and azoxystrobin application on total weight losses, and its components - weight loss by transpiration (WL-transp) and by respiration (WL-resp) – of stored leaves of butterhead lettuce.

| Treatments                  | Weight loss (WL)             |         |           |
|-----------------------------|------------------------------|---------|-----------|
|                             | WL-total                     | WL-resp | WL-transp |
|                             | (g 100 g <sup>-1</sup> f.w.) |         |           |
| N rate (N)                  |                              |         |           |
| N0                          | 1.1a <sup>(2)</sup>          | 0.4a    | 0.6a      |
| N50                         | 1.1a                         | 0.5a    | 0.6a      |
| N100                        | 1.0a                         | 0.5a    | 0.5a      |
| Azoxystrobin (Azox)         |                              |         |           |
| Azox-                       | 1.0a                         | 0.4a    | 0.6a      |
| Azox+ <sub>65+85</sub>      | 1.2a                         | 0.5a    | 0.6a      |
| Azox+ <sub>65+100</sub>     | 1.0a                         | 0.4a    | 0.5a      |
| Significance <sup>(1)</sup> |                              |         |           |
| N                           | ns                           | ns      | ns        |
| Azox                        | ns                           | ns      | ns        |
| N x Azox                    | ns                           | ns      | ns        |

<sup>(1)</sup>n.s., not significant or significant at  $p \leq 0.05$ , respectively. <sup>(2)</sup> Different letters within the column indicate significant differences at  $p = 0.05$ .

**Figure S1.** Stored shredded leaves.

Cold-stored shredded leaves of butterhead lettuce **un-treated** by azoxystrobin.

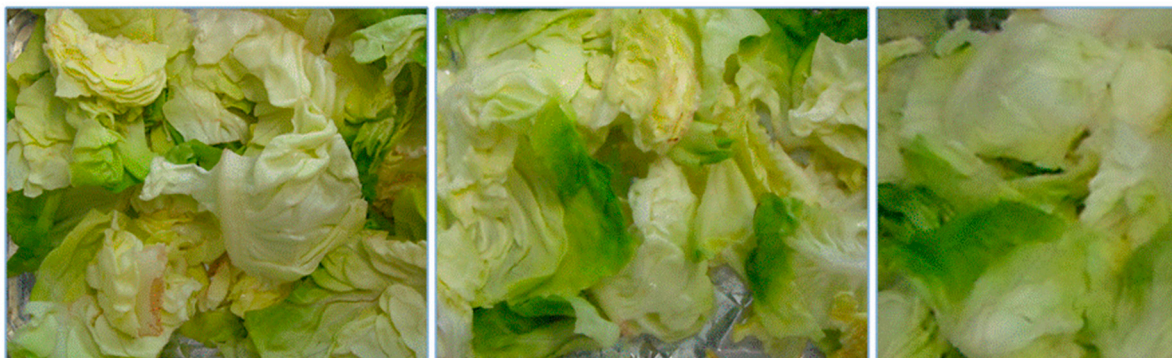

Cold-stored shredded leaves of butterhead lettuce **treated** by azoxystrobin.

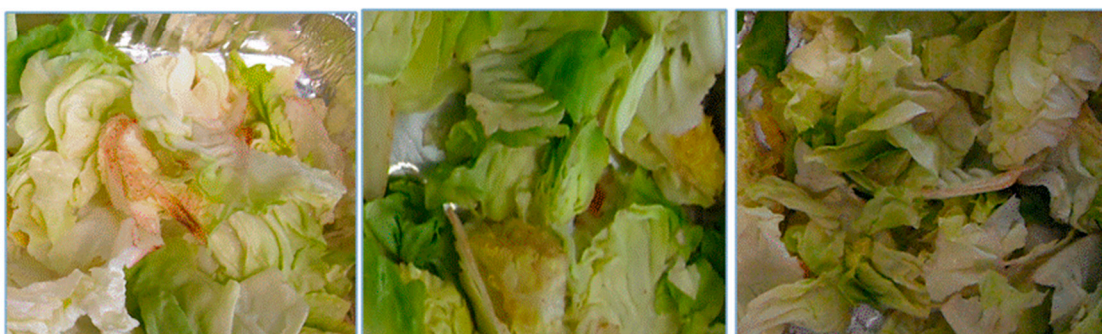

Supplement: s1 [file s1]
